# Supplementary material for: Enhancing the stability and efficiency of carbon-based perovskite solar cell performance with ZrO2-decorated rGO nanosheets in a mesoporous TiO2 electron-transport layer
Source: PubMed Central journal article supplement — Nanoscale Adv. 2023 Dec 7;6(2):548–58. doi: 10.1039/d3na00757j (PMC10790978; doi:10.1039/d3na00757j), 2023-12-07
Supplement: NA-006-D3NA00757J-s001.pdf [file NA-006-D3NA00757J-s001.pdf]

## Supporting information

### Enhancing the Stability and Efficiency of Carbon-Based Perovskite Solar Cell Performance with ZrO<sub>2</sub>-Decorated rGO Nano-sheets in a Mesoporous TiO<sub>2</sub> Electron Transport Layer

Anjan Kumar<sup>1</sup>, M. I. Sayyed<sup>2,3</sup>, Anmar Ghanim Taki<sup>4\*</sup>, Vanessa Valverde<sup>5</sup>, Eduardo Hernández<sup>6</sup>

<sup>1</sup>Department of Electronics and Communication, GLA University, Mathura-281406, India

<sup>2</sup>Department of Physics, Faculty of Science, Isra University, Amman 11622, Jordan

<sup>3</sup> Renewable Energy and Environmental Technology Center, University of Tabuk, Tabuk 47913, Saudi Arabia.

<sup>4</sup> Department of Radiology & Sonar Techniques, Al-Noor University College, Nineveh, Iraq

<sup>5</sup>Facultad Mecánica, Escuela Superior Politécnica de Chimborazo (ESPOCH), Riobamba, 060155, Ecuador

<sup>6</sup>Facultad Mecánica, Escuela Superior Politécnica de Chimborazo (ESPOCH), Riobamba, 060155, Ecuador.

\*Corresponding author email: [anmar.ghanim@alnoor.edu.iq](mailto:anmar.ghanim@alnoor.edu.iq)

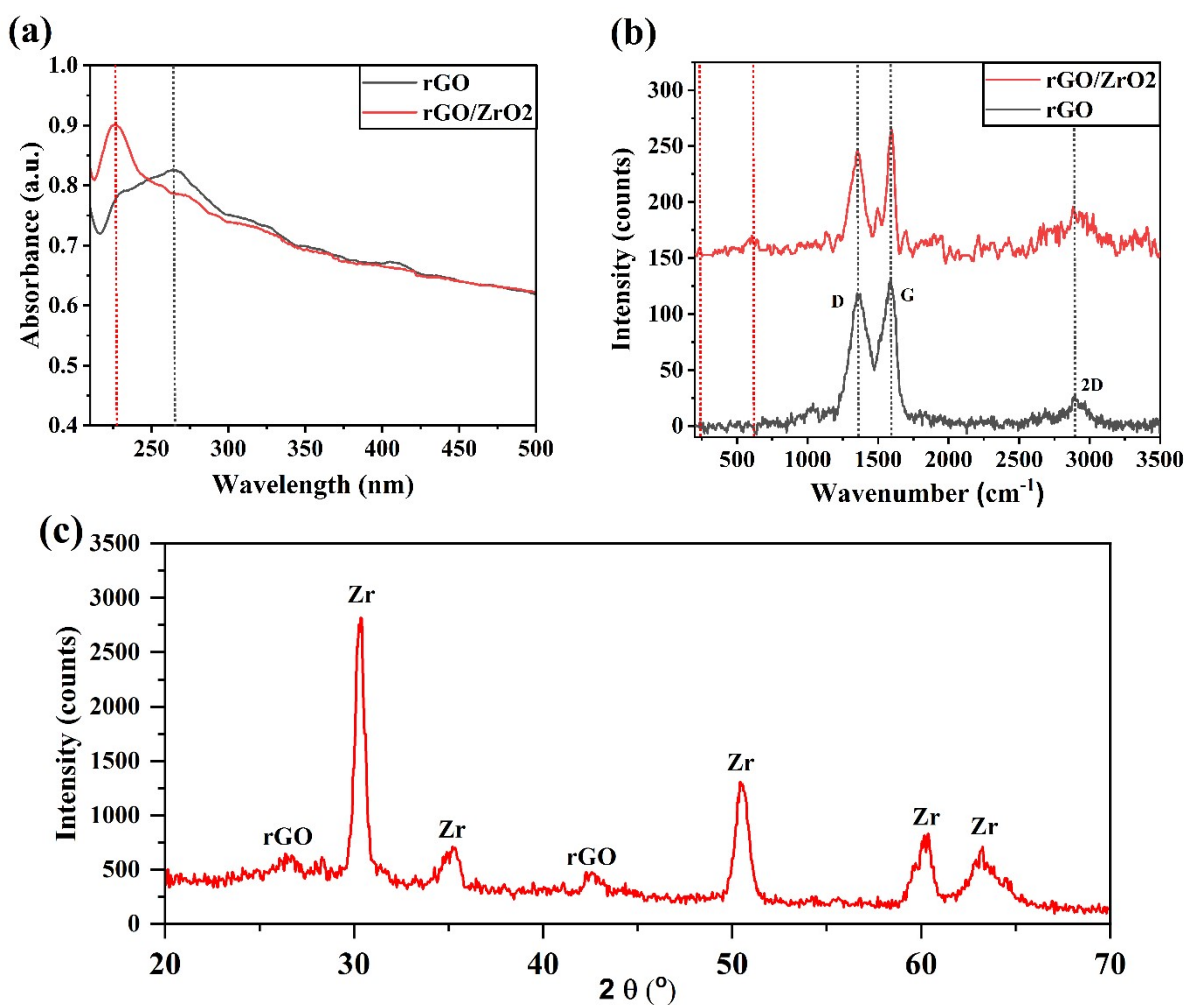

**Figure S1.** (a) UV-Vis and (b) RAMAN spectra of rGO and rGO/ZrO<sub>2</sub> materials. (c) XRD pattern of rGO/ZrO<sub>2</sub> nanocomposite.

**Note 1:**

Figure S1a shows the absorbance spectra of rGO and rGO/ZrO<sub>2</sub> materials. While rGO material has a peak at 265 nm, the rGO/ZrO<sub>2</sub> nanocomposite has two peaks at 227 nm related to the ZrO<sub>2</sub> phase and a shoulder peak at 273 nm related to the rGO phase. Figure S1b shows the RAMAN spectra of samples. As shown, in rGO/ZrO<sub>2</sub> profile, in addition to rGO RAMAN peaks an additional peak at 603 cm<sup>-1</sup> related to ZrO<sub>2</sub> NPs is observed. Notably, the I<sub>D</sub>/I<sub>G</sub> ratio for rGO is 0.90, higher than the 0.81 calculated for rGO/ZrO<sub>2</sub> material. It indicates that during the synthesis process of rGO/ZrO<sub>2</sub>, regions of sp<sup>2</sup> would be enlarged, which increases the electrical conductivity of rGO derivatives. This phenomenon agrees with the redshift of absorbance peak of rGO in rGO/ZrO<sub>2</sub>. Successful synthesis of rGO/ZrO<sub>2</sub> nanocomposite is approved with presence of ZrO<sub>2</sub> phase in XRD pattern of rGO/ZrO<sub>2</sub> (Figure S1c).

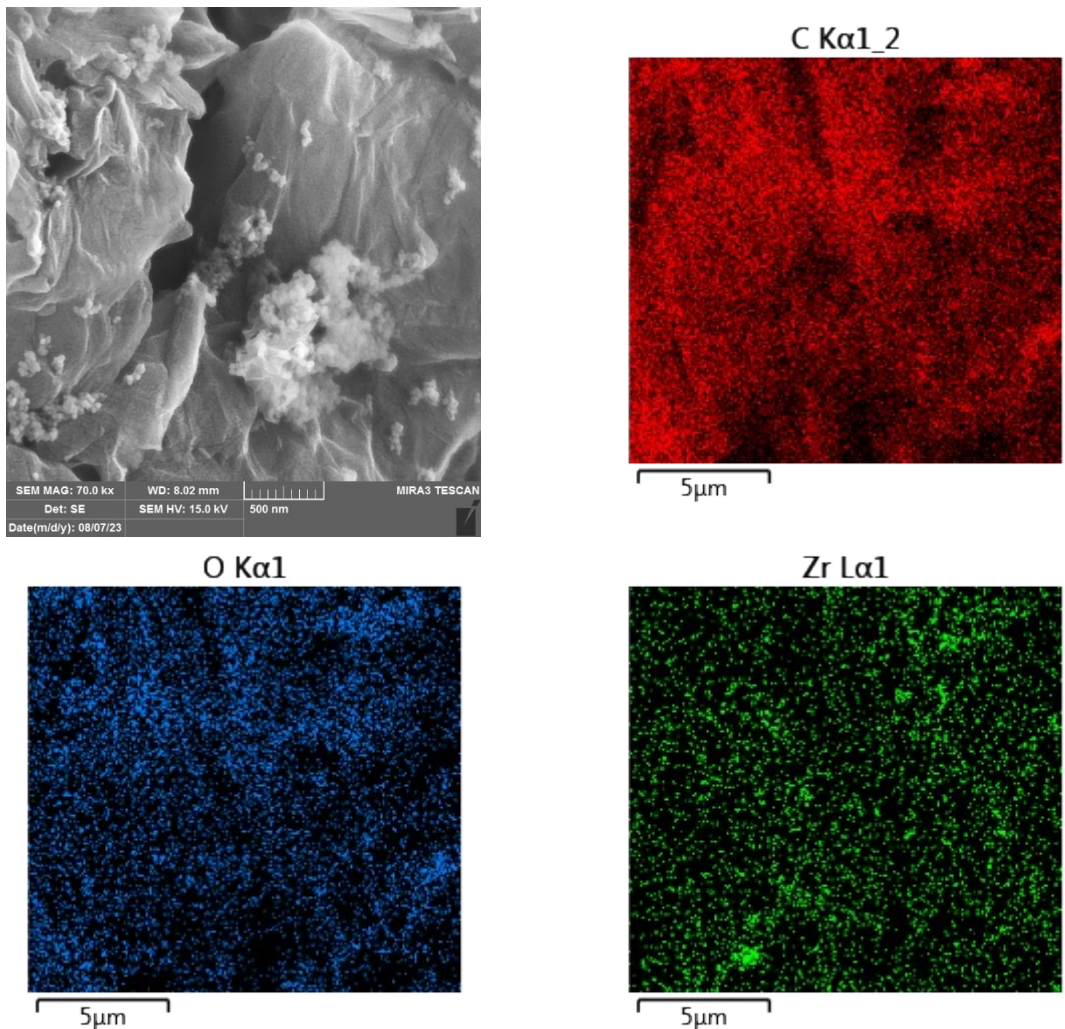

**Figure S2.** FESEM image of rGO/ZrO<sub>2</sub> nanocomposite with related elemental mapping.

**Note 2:**

Figure S2 shows the FESEM image of rGO/ZrO<sub>2</sub> nanocomposite. As can be seen, nanocomposites have wrinkle sheets that are covered with ZrO<sub>2</sub> NPs. In addition, the elemental mapping analysis of rGO/ZrO<sub>2</sub> for C, O, and Zr reveals that the ZrO<sub>2</sub> NPs nanoparticles were homogeneously distributed on the rGO sheets. Elemental mapping results approve the successful formation of rGO/ZrO<sub>2</sub> nanocomposites.

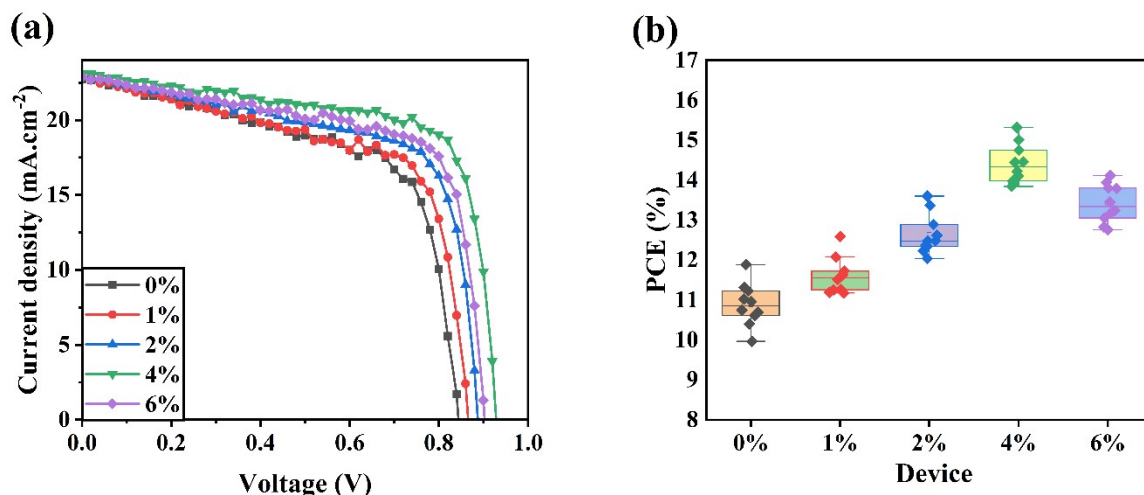

**Figure S3.** (a) J-V curves and (b) PCE distributions of fabricated HTL-free CPSCs with ETLs doped with different amounts of rGO/ZrO<sub>2</sub> dopant.

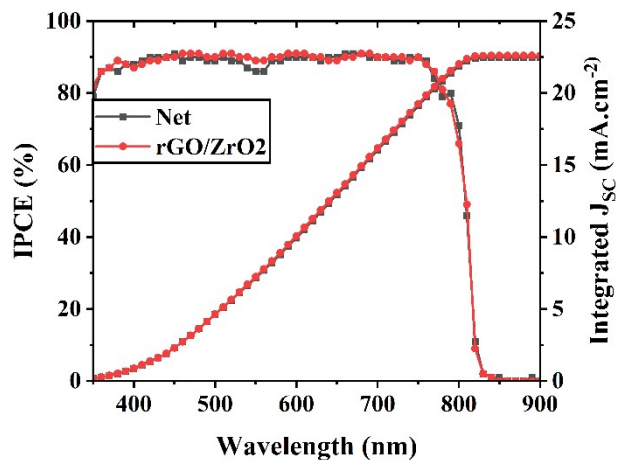

**Figure S4:** IPCE spectra of net and rGO/ZrO<sub>2</sub> HTL-free CPSCs with related integrated current density.

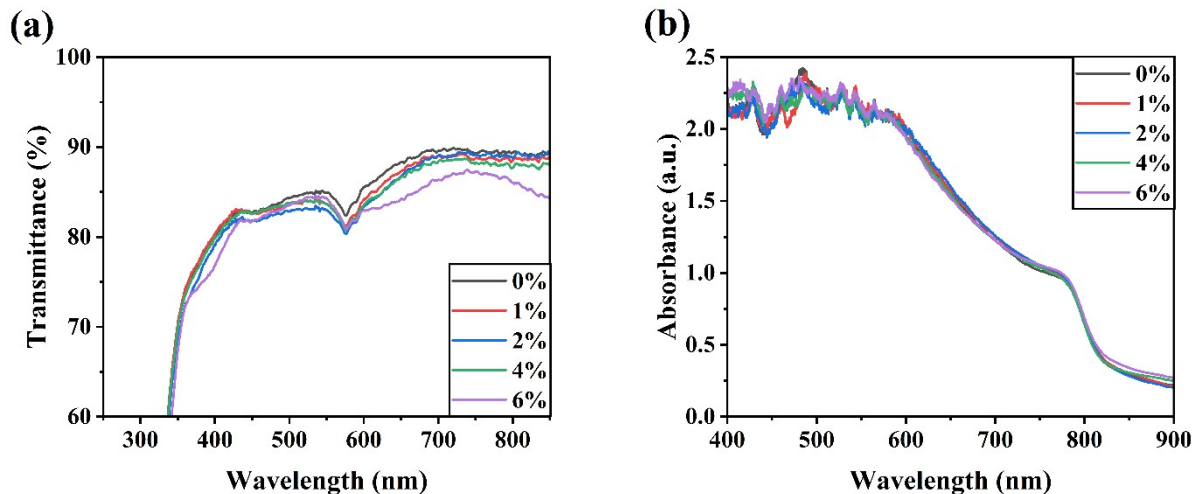

**Figure S5.** (a) Transmittance of ETLs doped with different amounts of rGO/ZrO<sub>2</sub> nanocomposite. (b) Absorbance of perovskite layers fabricated ETLs doped with different amounts of rGO/ZrO<sub>2</sub> dopant.

**Table S1.** Photovoltaic parameters of fabricated HTL-free CPSCs with ETLs doped with different amounts of rGO/ZrO<sub>2</sub> dopant.

| Device name |         | V <sub>OC</sub> (V) | J <sub>SC</sub> (mA.cm <sup>-2</sup> ) | FF (%) | PCE (%) |
|-------------|---------|---------------------|----------------------------------------|--------|---------|
| 0%          | Average | 0.816               | 22.61                                  | 58.96  | 10.88   |
|             | Best    | 0.850               | 22.79                                  | 61.32  | 11.88   |
| 1%          | Average | 0.836               | 22.57                                  | 61.47  | 11.60   |
|             | Best    | 0.870               | 22.88                                  | 63.27  | 12.59   |
| 2%          | Average | 0.866               | 22.60                                  | 64.54  | 12.64   |
|             | Best    | 0.890               | 22.86                                  | 66.84  | 13.60   |
| 4%          | Average | 0.900               | 22.74                                  | 70.31  | 14.39   |
|             | Best    | 0.930               | 23.11                                  | 70.76  | 15.21   |
| 6%          | Average | 0.884               | 22.65                                  | 66.98  | 13.41   |
|             | Best    | 0.910               | 22.89                                  | 67.76  | 14.12   |

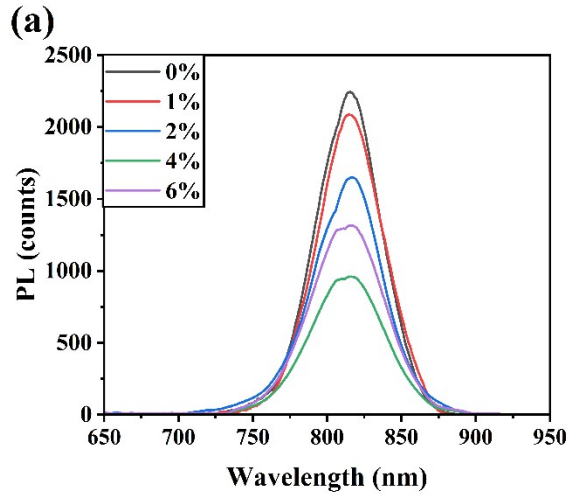

**Figure S6.** PL spectra of fabricated perovskite layers on ETLs doped with different amounts of rGO/ZrO<sub>2</sub> dopant.

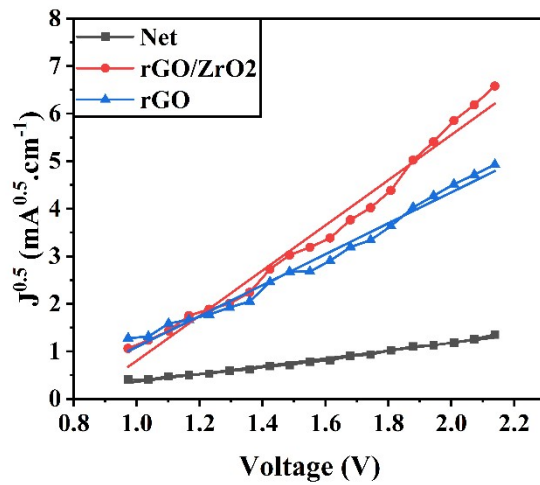

**Figure S7.** J<sup>0.5</sup>-V of different hole only devices with different ETLs

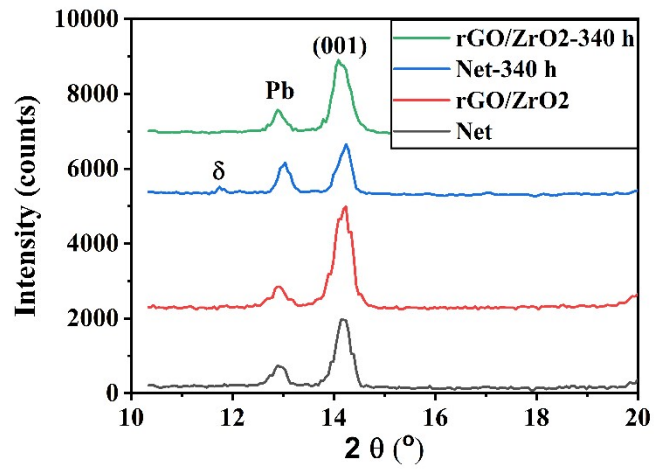

**Figure S8.** XRD pattern of perovskite layers during aging at a temperature of 50 °C in ambient air with a relative humidity of 25-30% for 340 h.
